# Supplementary material for: Ozone and Wounding Stresses Differently Alter the Temporal Variation in Formylated Phloroglucinols in Eucalyptus globulus Leaves
Source: PubMed Central journal article supplement (PMC6468632; doi:10.3390/metabo9030046), 2019-03-06

1 **Figure S1.** Correlations between total FPC concentrations and isoprene emissions (See Kanagendran, *et al.* [7] for  
2 graphical representation for isoprene emission) from wounding, O<sub>3</sub> and O<sub>3</sub> + wounding treated *E. globulus* leaves. Each  
3 date dot stands for mean of three independent biological replicates from 0.5 h, 25 h, 50 h and 75 h after the treatments.

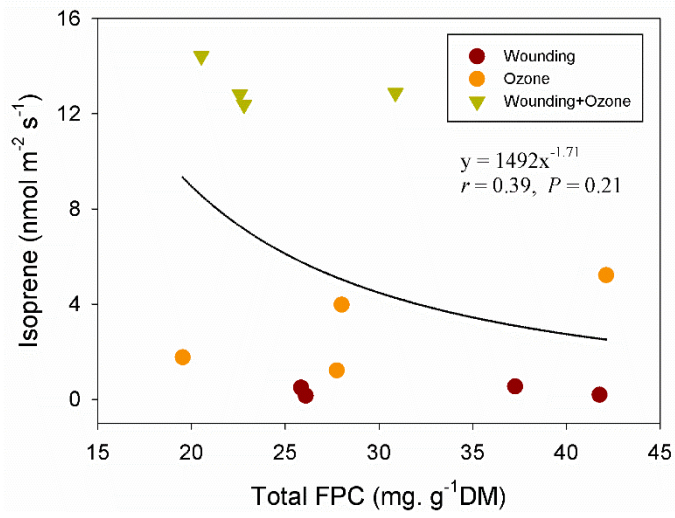

4

5

6

7 **Figure S2.** Correlations between total FPC concentrations and monoterpene emissions from wounding, O<sub>3</sub> and O<sub>3</sub> +  
 8 wounding treated *E. globulus* leaves. Emission rates of three most abundant monoterpenes and the total monoterpenes  
 9 were used for this correlation (See Kanagendran, *et al.* [7] for graphical representation for monoterpene emission).  
 10 Each date dot stands for mean of three independent biological replicates from 0.5 h, 25 h, 50 h and 75 h after the  
 11 treatments.

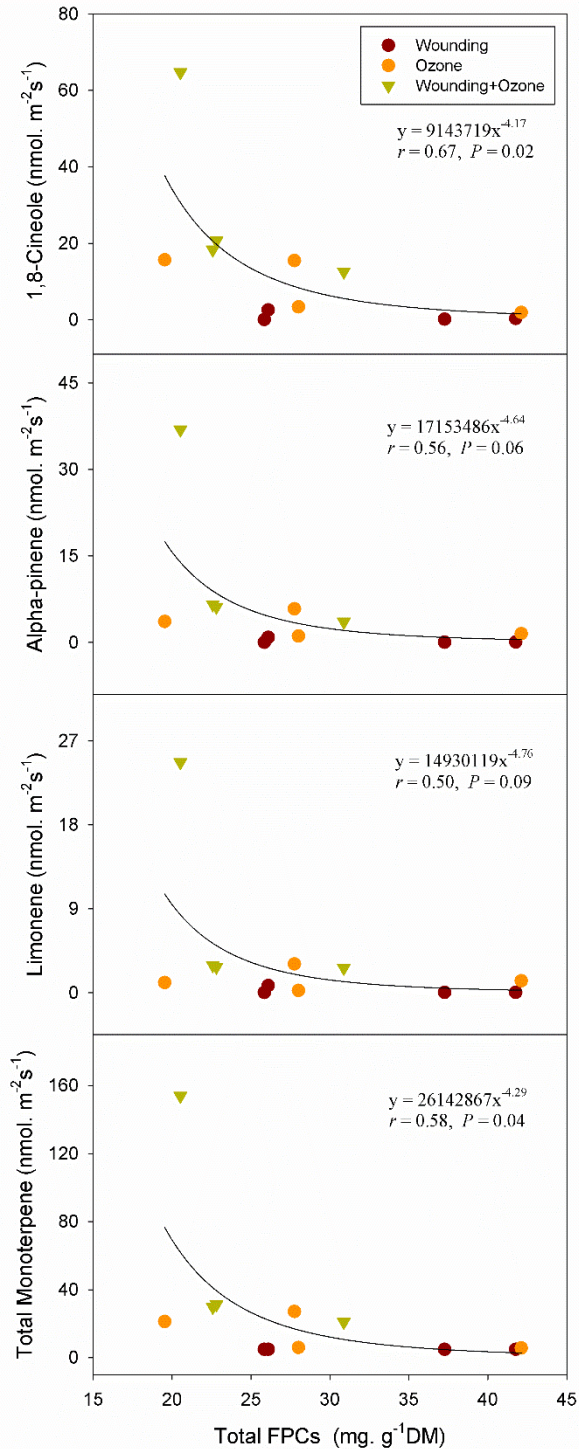

12

13

14

15 **Figure S3.** Correlations between total FPC concentrations and sesquiterpene emissions from wounding, O<sub>3</sub> and O<sub>3</sub> +  
 16 wounding treated *E. globulus* leaves. Emission rates of three most abundant sesquiterpenes and total sesquiterpene  
 17 (see Kanagendran, *et al.* [7] for graphical representation for sesquiterpene emission) were used for this correlation.  
 18 Each date dot stands for mean of three independent biological replicates from 0.5 h, 25 h, 50 h and 75 h after the  
 19 treatments. Outliers were indicated in grey ellipse.

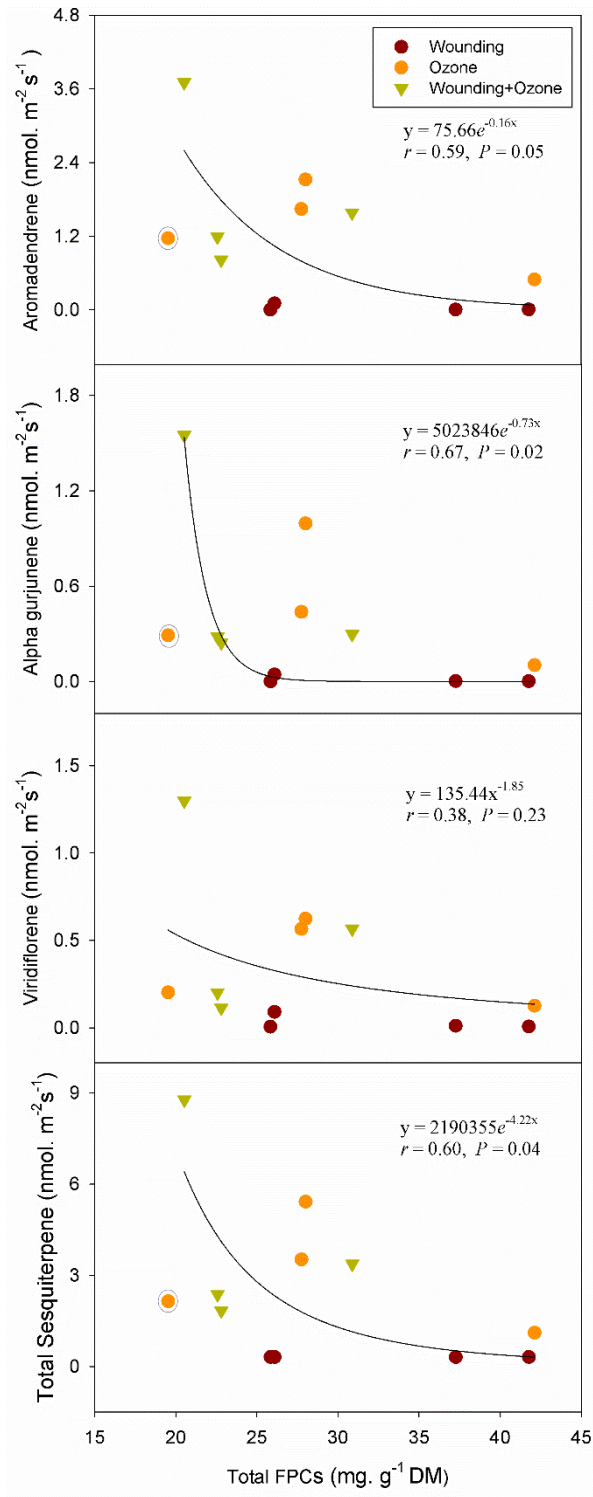

Supplement: metabolites-09-00046-s001.pdf [file metabolites-09-00046-s001.pdf]
